# Supplementary material
Source: PubMed Central journal article supplement (PMC5673256)
Supplement: NIHMS870497-supplement-1.pdf [file NIHMS870497-supplement-1.pdf]

Manuka Honey for Esophagitis

**Supplemental Table 1.** Number of Patients with an Adverse Event by System Organ Class, Term, and Grade Any Relationship to Protocol Treatment

| System Organ Class                           | Supportive Care<br>(n=48) |    |   |   |   | Liquid Honey<br>(n=50) |    |   |   |   | Lozenge Honey<br>(n=50) |    |   |   |   |
|----------------------------------------------|---------------------------|----|---|---|---|------------------------|----|---|---|---|-------------------------|----|---|---|---|
|                                              | Grade                     |    |   |   |   | Grade                  |    |   |   |   | Grade                   |    |   |   |   |
| Term                                         | 1                         | 2  | 3 | 4 | 5 | 1                      | 2  | 3 | 4 | 5 | 1                       | 2  | 3 | 4 | 5 |
| <b>BLOOD AND LYMPHATIC SYSTEM DISORDERS</b>  | 5                         | 6  | 3 | 1 | 0 | 9                      | 5  | 6 | 0 | 0 | 4                       | 4  | 6 | 0 | 0 |
| Anemia                                       | 6                         | 6  | 2 | 1 | 0 | 10                     | 5  | 5 | 0 | 0 | 4                       | 6  | 3 | 0 | 0 |
| Blood and lymphatic system disorders - Other | 0                         | 1  | 0 | 0 | 0 | 0                      | 0  | 0 | 0 | 0 | 0                       | 0  | 1 | 0 | 0 |
| Febrile neutropenia                          | 0                         | 0  | 1 | 0 | 0 | 0                      | 0  | 1 | 0 | 0 | 0                       | 0  | 3 | 0 | 0 |
| <b>CARDIAC DISORDERS</b>                     | 1                         | 1  | 2 | 0 | 1 | 2                      | 2  | 0 | 0 | 0 | 0                       | 0  | 1 | 0 | 0 |
| Atrial fibrillation                          | 0                         | 1  | 0 | 0 | 0 | 1                      | 1  | 0 | 0 | 0 | 0                       | 0  | 1 | 0 | 0 |
| Cardiac arrest                               | 0                         | 0  | 0 | 0 | 1 | 0                      | 0  | 0 | 0 | 0 | 0                       | 0  | 0 | 0 | 0 |
| Chest pain - cardiac                         | 0                         | 0  | 1 | 0 | 0 | 0                      | 0  | 0 | 0 | 0 | 0                       | 0  | 0 | 0 | 0 |
| Myocardial infarction                        | 0                         | 0  | 1 | 0 | 0 | 0                      | 0  | 0 | 0 | 0 | 0                       | 0  | 0 | 0 | 0 |
| Palpitations                                 | 1                         | 0  | 0 | 0 | 0 | 0                      | 0  | 0 | 0 | 0 | 0                       | 0  | 0 | 0 | 0 |
| Sinus tachycardia                            | 0                         | 0  | 0 | 0 | 0 | 1                      | 1  | 0 | 0 | 0 | 0                       | 0  | 0 | 0 | 0 |
| Supraventricular tachycardia                 | 1                         | 0  | 0 | 0 | 0 | 0                      | 0  | 0 | 0 | 0 | 0                       | 0  | 0 | 0 | 0 |
| <b>EAR AND LABYRINTH DISORDERS</b>           | 2                         | 0  | 0 | 0 | 0 | 1                      | 0  | 0 | 0 | 0 | 1                       | 1  | 0 | 0 | 0 |
| Ear pain                                     | 0                         | 0  | 0 | 0 | 0 | 1                      | 0  | 0 | 0 | 0 | 0                       | 0  | 0 | 0 | 0 |
| Tinnitus                                     | 2                         | 0  | 0 | 0 | 0 | 1                      | 0  | 0 | 0 | 0 | 0                       | 1  | 0 | 0 | 0 |
| Vertigo                                      | 0                         | 0  | 0 | 0 | 0 | 0                      | 0  | 0 | 0 | 0 | 1                       | 0  | 0 | 0 | 0 |
| <b>EYE DISORDERS</b>                         | 0                         | 0  | 0 | 0 | 0 | 0                      | 1  | 0 | 0 | 0 | 2                       | 0  | 0 | 0 | 0 |
| Blurred vision                               | 0                         | 0  | 0 | 0 | 0 | 0                      | 1  | 0 | 0 | 0 | 0                       | 0  | 0 | 0 | 0 |
| Dry eye                                      | 0                         | 0  | 0 | 0 | 0 | 0                      | 0  | 0 | 0 | 0 | 1                       | 0  | 0 | 0 | 0 |
| Eye disorders - Other                        | 0                         | 0  | 0 | 0 | 0 | 0                      | 0  | 0 | 0 | 0 | 1                       | 0  | 0 | 0 | 0 |
| <b>GASTROINTESTINAL DISORDERS</b>            | 7                         | 20 | 8 | 0 | 0 | 9                      | 28 | 6 | 0 | 0 | 10                      | 18 | 5 | 1 | 0 |
| Abdominal pain                               | 1                         | 0  | 0 | 0 | 0 | 0                      | 1  | 0 | 0 | 0 | 0                       | 1  | 0 | 0 | 0 |
| Colonic perforation                          | 0                         | 0  | 0 | 0 | 0 | 0                      | 0  | 0 | 0 | 0 | 0                       | 0  | 1 | 0 | 0 |
| Constipation                                 | 11                        | 2  | 0 | 0 | 0 | 13                     | 1  | 1 | 0 | 0 | 10                      | 0  | 0 | 0 | 0 |

Manuka Honey for Esophagitis

| System Organ Class<br>Term                                      | Supportive Care<br>(n=48)<br>Grade |           |          |          |          | Liquid Honey<br>(n=50)<br>Grade |           |          |          |          | Lozenge Honey<br>(n=50)<br>Grade |           |          |          |          |
|-----------------------------------------------------------------|------------------------------------|-----------|----------|----------|----------|---------------------------------|-----------|----------|----------|----------|----------------------------------|-----------|----------|----------|----------|
|                                                                 | 1                                  | 2         | 3        | 4        | 5        | 1                               | 2         | 3        | 4        | 5        | 1                                | 2         | 3        | 4        | 5        |
| Diarrhea                                                        | 7                                  | 2         | 0        | 0        | 0        | 9                               | 2         | 1        | 0        | 0        | 2                                | 1         | 0        | 0        | 0        |
| Dry mouth                                                       | 3                                  | 0         | 0        | 0        | 0        | 5                               | 0         | 0        | 0        | 0        | 2                                | 0         | 0        | 0        | 0        |
| Dyspepsia                                                       | 6                                  | 4         | 0        | 0        | 0        | 4                               | 2         | 0        | 0        | 0        | 1                                | 1         | 0        | 0        | 0        |
| Dysphagia                                                       | 6                                  | 11        | 0        | 0        | 0        | 5                               | 13        | 2        | 0        | 0        | 7                                | 10        | 0        | 0        | 0        |
| Esophageal pain                                                 | 0                                  | 2         | 0        | 0        | 0        | 3                               | 5         | 0        | 0        | 0        | 1                                | 1         | 1        | 0        | 0        |
| Esophagitis                                                     | 4                                  | 10        | 6        | 0        | 0        | 3                               | 15        | 1        | 0        | 0        | 3                                | 9         | 3        | 0        | 0        |
| Flatulence                                                      | 0                                  | 1         | 0        | 0        | 0        | 0                               | 0         | 0        | 0        | 0        | 0                                | 0         | 0        | 0        | 0        |
| Gastritis                                                       | 0                                  | 0         | 0        | 0        | 0        | 0                               | 1         | 0        | 0        | 0        | 0                                | 0         | 0        | 0        | 0        |
| Gastroesophageal reflux disease                                 | 0                                  | 0         | 0        | 0        | 0        | 2                               | 3         | 0        | 0        | 0        | 1                                | 2         | 0        | 0        | 0        |
| Gastrointestinal disorders - Other                              | 0                                  | 0         | 0        | 0        | 0        | 1                               | 2         | 0        | 0        | 0        | 1                                | 0         | 0        | 1        | 0        |
| Gastrointestinal pain                                           | 0                                  | 0         | 0        | 0        | 0        | 0                               | 0         | 0        | 0        | 0        | 1                                | 0         | 0        | 0        | 0        |
| Mucositis oral                                                  | 2                                  | 0         | 0        | 0        | 0        | 1                               | 1         | 0        | 0        | 0        | 3                                | 1         | 1        | 0        | 0        |
| Nausea                                                          | 9                                  | 7         | 1        | 0        | 0        | 10                              | 12        | 1        | 0        | 0        | 7                                | 4         | 0        | 0        | 0        |
| Oral pain                                                       | 0                                  | 0         | 0        | 0        | 0        | 1                               | 0         | 0        | 0        | 0        | 1                                | 0         | 0        | 0        | 0        |
| Small intestinal obstruction                                    | 0                                  | 0         | 1        | 0        | 0        | 0                               | 0         | 0        | 0        | 0        | 0                                | 0         | 0        | 0        | 0        |
| Vomiting                                                        | 5                                  | 2         | 1        | 0        | 0        | 6                               | 0         | 0        | 0        | 0        | 4                                | 0         | 0        | 0        | 0        |
| <b>GENERAL DISORDERS AND<br/>ADMINISTRATION SITE CONDITIONS</b> | <b>15</b>                          | <b>12</b> | <b>4</b> | <b>0</b> | <b>0</b> | <b>7</b>                        | <b>22</b> | <b>0</b> | <b>0</b> | <b>0</b> | <b>11</b>                        | <b>11</b> | <b>1</b> | <b>0</b> | <b>0</b> |
| Chills                                                          | 0                                  | 0         | 0        | 0        | 0        | 1                               | 0         | 0        | 0        | 0        | 0                                | 0         | 0        | 0        | 0        |
| Edema limbs                                                     | 1                                  | 1         | 0        | 0        | 0        | 0                               | 1         | 0        | 0        | 0        | 0                                | 0         | 0        | 0        | 0        |
| Fatigue                                                         | 13                                 | 12        | 3        | 0        | 0        | 9                               | 19        | 0        | 0        | 0        | 11                               | 10        | 1        | 0        | 0        |
| Fever                                                           | 1                                  | 0         | 0        | 0        | 0        | 2                               | 0         | 0        | 0        | 0        | 1                                | 0         | 0        | 0        | 0        |
| General disorders and administration site conditions - Other    | 1                                  | 0         | 0        | 0        | 0        | 0                               | 0         | 0        | 0        | 0        | 0                                | 0         | 0        | 0        | 0        |
| Infusion related reaction                                       | 0                                  | 0         | 1        | 0        | 0        | 0                               | 1         | 0        | 0        | 0        | 0                                | 0         | 0        | 0        | 0        |
| Irritability                                                    | 0                                  | 0         | 0        | 0        | 0        | 0                               | 1         | 0        | 0        | 0        | 0                                | 0         | 0        | 0        | 0        |
| Localized edema                                                 | 1                                  | 0         | 0        | 0        | 0        | 0                               | 0         | 0        | 0        | 0        | 0                                | 0         | 0        | 0        | 0        |
| Non-cardiac chest pain                                          | 1                                  | 0         | 0        | 0        | 0        | 0                               | 3         | 0        | 0        | 0        | 0                                | 0         | 0        | 0        | 0        |
| Pain                                                            | 3                                  | 0         | 0        | 0        | 0        | 5                               | 1         | 0        | 0        | 0        | 3                                | 1         | 0        | 0        | 0        |

Manuka Honey for Esophagitis

| System Organ Class<br>Term                                | Supportive Care<br>(n=48)<br>Grade |   |   |   |   | Liquid Honey<br>(n=50)<br>Grade |   |   |   |   | Lozenge Honey<br>(n=50)<br>Grade |   |   |   |   |
|-----------------------------------------------------------|------------------------------------|---|---|---|---|---------------------------------|---|---|---|---|----------------------------------|---|---|---|---|
|                                                           | 1                                  | 2 | 3 | 4 | 5 | 1                               | 2 | 3 | 4 | 5 | 1                                | 2 | 3 | 4 | 5 |
| <b>INFECTIONS AND INFESTATIONS</b>                        | 0                                  | 2 | 4 | 0 | 1 | 1                               | 6 | 4 | 0 | 0 | 1                                | 3 | 2 | 0 | 1 |
| Infections and infestations - Other                       | 0                                  | 0 | 0 | 0 | 0 | 1                               | 0 | 1 | 0 | 0 | 2                                | 0 | 0 | 0 | 0 |
| Lung infection                                            | 0                                  | 1 | 2 | 0 | 0 | 0                               | 0 | 0 | 0 | 0 | 0                                | 0 | 2 | 0 | 0 |
| Mucosal infection                                         | 0                                  | 0 | 0 | 0 | 0 | 0                               | 3 | 0 | 0 | 0 | 0                                | 2 | 0 | 0 | 0 |
| Papulopustular rash                                       | 0                                  | 0 | 0 | 0 | 0 | 1                               | 0 | 0 | 0 | 0 | 0                                | 0 | 0 | 0 | 0 |
| Sepsis                                                    | 0                                  | 0 | 0 | 0 | 1 | 0                               | 0 | 0 | 0 | 0 | 0                                | 0 | 0 | 0 | 1 |
| Sinusitis                                                 | 0                                  | 0 | 0 | 0 | 0 | 0                               | 1 | 0 | 0 | 0 | 0                                | 0 | 0 | 0 | 0 |
| Skin infection                                            | 0                                  | 0 | 0 | 0 | 0 | 0                               | 1 | 1 | 0 | 0 | 0                                | 0 | 0 | 0 | 0 |
| Upper respiratory infection                               | 0                                  | 0 | 0 | 0 | 0 | 0                               | 1 | 0 | 0 | 0 | 0                                | 0 | 0 | 0 | 0 |
| Urinary tract infection                                   | 0                                  | 1 | 2 | 0 | 0 | 0                               | 1 | 2 | 0 | 0 | 0                                | 1 | 0 | 0 | 0 |
| Vaginal infection                                         | 0                                  | 1 | 0 | 0 | 0 | 0                               | 0 | 0 | 0 | 0 | 0                                | 0 | 0 | 0 | 0 |
| <b>INJURY, POISONING AND PROCEDURAL<br/>COMPLICATIONS</b> | 7                                  | 4 | 1 | 0 | 0 | 8                               | 5 | 0 | 0 | 0 | 4                                | 7 | 1 | 0 | 0 |
| Burn                                                      | 0                                  | 0 | 0 | 0 | 0 | 2                               | 0 | 0 | 0 | 0 | 0                                | 0 | 0 | 0 | 0 |
| Dermatitis radiation                                      | 7                                  | 4 | 1 | 0 | 0 | 4                               | 3 | 0 | 0 | 0 | 5                                | 5 | 1 | 0 | 0 |
| Fall                                                      | 0                                  | 0 | 0 | 0 | 0 | 1                               | 0 | 0 | 0 | 0 | 0                                | 1 | 0 | 0 | 0 |
| Injury, poisoning and procedural complications -<br>Other | 0                                  | 0 | 0 | 0 | 0 | 0                               | 0 | 0 | 0 | 0 | 0                                | 1 | 0 | 0 | 0 |
| Radiation recall reaction (dermatologic)                  | 0                                  | 0 | 0 | 0 | 0 | 1                               | 2 | 0 | 0 | 0 | 0                                | 0 | 0 | 0 | 0 |
| <b>INVESTIGATIONS</b>                                     | 3                                  | 4 | 6 | 3 | 0 | 5                               | 6 | 9 | 4 | 0 | 2                                | 4 | 4 | 7 | 0 |
| Alanine aminotransferase increased                        | 1                                  | 0 | 0 | 0 | 0 | 1                               | 0 | 0 | 0 | 0 | 0                                | 3 | 0 | 1 | 0 |
| Alkaline phosphatase increased                            | 2                                  | 0 | 0 | 0 | 0 | 3                               | 0 | 0 | 0 | 0 | 1                                | 0 | 0 | 0 | 0 |
| Aspartate aminotransferase increased                      | 2                                  | 0 | 0 | 0 | 0 | 0                               | 0 | 0 | 0 | 0 | 0                                | 2 | 0 | 1 | 0 |
| Creatinine increased                                      | 1                                  | 1 | 0 | 0 | 0 | 3                               | 2 | 0 | 0 | 0 | 1                                | 1 | 1 | 0 | 0 |
| GGT increased                                             | 1                                  | 0 | 0 | 0 | 0 | 0                               | 0 | 0 | 0 | 0 | 0                                | 0 | 0 | 0 | 0 |
| Lipase increased                                          | 0                                  | 0 | 0 | 0 | 0 | 1                               | 0 | 0 | 0 | 0 | 0                                | 0 | 0 | 0 | 0 |
| Lymphocyte count decreased                                | 1                                  | 1 | 4 | 1 | 0 | 0                               | 0 | 4 | 1 | 0 | 0                                | 1 | 1 | 0 | 0 |
| Neutrophil count decreased                                | 0                                  | 2 | 3 | 2 | 0 | 1                               | 3 | 2 | 2 | 0 | 3                                | 2 | 2 | 5 | 0 |
| Platelet count decreased                                  | 1                                  | 2 | 0 | 2 | 0 | 5                               | 2 | 3 | 0 | 0 | 5                                | 1 | 3 | 3 | 0 |

Manuka Honey for Esophagitis

| System Organ Class<br>Term                                 | Supportive Care<br>(n=48)<br>Grade |   |   |   |   | Liquid Honey<br>(n=50)<br>Grade |    |   |   |   | Lozenge Honey<br>(n=50)<br>Grade |   |   |   |   |
|------------------------------------------------------------|------------------------------------|---|---|---|---|---------------------------------|----|---|---|---|----------------------------------|---|---|---|---|
|                                                            | 1                                  | 2 | 3 | 4 | 5 | 1                               | 2  | 3 | 4 | 5 | 1                                | 2 | 3 | 4 | 5 |
| Weight loss                                                | 2                                  | 2 | 0 | 0 | 0 | 5                               | 4  | 0 | 0 | 0 | 2                                | 1 | 0 | 0 | 0 |
| White blood cell decreased                                 | 1                                  | 2 | 4 | 2 | 0 | 1                               | 6  | 6 | 2 | 0 | 1                                | 1 | 5 | 3 | 0 |
| <b>METABOLISM AND NUTRITION DISORDERS</b>                  | 9                                  | 7 | 4 | 1 | 0 | 9                               | 12 | 4 | 1 | 0 | 3                                | 7 | 6 | 0 | 0 |
| Anorexia                                                   | 5                                  | 5 | 1 | 0 | 0 | 6                               | 11 | 0 | 0 | 0 | 0                                | 4 | 1 | 0 | 0 |
| Dehydration                                                | 1                                  | 5 | 3 | 0 | 0 | 2                               | 6  | 2 | 0 | 0 | 1                                | 3 | 2 | 0 | 0 |
| Hyperglycemia                                              | 2                                  | 0 | 0 | 0 | 0 | 3                               | 2  | 2 | 0 | 0 | 0                                | 0 | 2 | 0 | 0 |
| Hyperkalemia                                               | 0                                  | 0 | 0 | 0 | 0 | 0                               | 0  | 1 | 0 | 0 | 1                                | 0 | 0 | 0 | 0 |
| Hypernatremia                                              | 0                                  | 0 | 0 | 0 | 0 | 0                               | 1  | 0 | 0 | 0 | 1                                | 0 | 0 | 0 | 0 |
| Hypoalbuminemia                                            | 3                                  | 2 | 0 | 0 | 0 | 5                               | 0  | 0 | 0 | 0 | 5                                | 0 | 0 | 0 | 0 |
| Hypocalcemia                                               | 2                                  | 0 | 0 | 0 | 0 | 2                               | 1  | 0 | 0 | 0 | 1                                | 0 | 0 | 0 | 0 |
| Hypoglycemia                                               | 0                                  | 0 | 0 | 0 | 0 | 1                               | 0  | 0 | 0 | 0 | 0                                | 0 | 0 | 0 | 0 |
| Hypokalemia                                                | 3                                  | 1 | 0 | 1 | 0 | 5                               | 0  | 0 | 1 | 0 | 0                                | 2 | 1 | 0 | 0 |
| Hypomagnesemia                                             | 2                                  | 0 | 0 | 0 | 0 | 3                               | 0  | 0 | 0 | 0 | 2                                | 1 | 0 | 0 | 0 |
| Hyponatremia                                               | 4                                  | 0 | 0 | 0 | 0 | 5                               | 0  | 1 | 0 | 0 | 2                                | 0 | 1 | 0 | 0 |
| Hypophosphatemia                                           | 0                                  | 0 | 1 | 0 | 0 | 0                               | 0  | 0 | 0 | 0 | 0                                | 0 | 0 | 0 | 0 |
| <b>MUSCULOSKELETAL AND CONNECTIVE<br/>TISSUE DISORDERS</b> | 4                                  | 3 | 0 | 0 | 0 | 4                               | 5  | 1 | 0 | 0 | 1                                | 1 | 1 | 0 | 0 |
| Arthralgia                                                 | 1                                  | 0 | 0 | 0 | 0 | 1                               | 0  | 0 | 0 | 0 | 0                                | 0 | 0 | 0 | 0 |
| Arthritis                                                  | 0                                  | 0 | 0 | 0 | 0 | 1                               | 0  | 0 | 0 | 0 | 0                                | 0 | 0 | 0 | 0 |
| Back pain                                                  | 0                                  | 2 | 0 | 0 | 0 | 2                               | 1  | 1 | 0 | 0 | 0                                | 0 | 0 | 0 | 0 |
| Chest wall pain                                            | 1                                  | 1 | 0 | 0 | 0 | 2                               | 2  | 0 | 0 | 0 | 1                                | 0 | 0 | 0 | 0 |
| Flank pain                                                 | 0                                  | 0 | 0 | 0 | 0 | 0                               | 0  | 0 | 0 | 0 | 0                                | 0 | 1 | 0 | 0 |
| Muscle weakness lower limb                                 | 0                                  | 0 | 0 | 0 | 0 | 0                               | 0  | 1 | 0 | 0 | 0                                | 0 | 0 | 0 | 0 |
| Musculoskeletal and connective tissue disorder -<br>Other  | 0                                  | 0 | 0 | 0 | 0 | 1                               | 0  | 0 | 0 | 0 | 0                                | 0 | 0 | 0 | 0 |
| Myalgia                                                    | 1                                  | 0 | 0 | 0 | 0 | 0                               | 0  | 0 | 0 | 0 | 0                                | 0 | 0 | 0 | 0 |
| Pain in extremity                                          | 2                                  | 0 | 0 | 0 | 0 | 0                               | 2  | 0 | 0 | 0 | 0                                | 1 | 0 | 0 | 0 |

Manuka Honey for Esophagitis

| System Organ Class<br>Term                                          | Supportive Care<br>(n=48)<br>Grade |   |   |   |   | Liquid Honey<br>(n=50)<br>Grade |   |   |   |   | Lozenge Honey<br>(n=50)<br>Grade |   |   |   |   |
|---------------------------------------------------------------------|------------------------------------|---|---|---|---|---------------------------------|---|---|---|---|----------------------------------|---|---|---|---|
|                                                                     | 1                                  | 2 | 3 | 4 | 5 | 1                               | 2 | 3 | 4 | 5 | 1                                | 2 | 3 | 4 | 5 |
| NEOPLASMS BENIGN, MALIGNANT AND UNSPECIFIED (INCL CYSTS AND POLYPS) | 0                                  | 1 | 0 | 0 | 0 | 0                               | 0 | 0 | 0 | 0 | 0                                | 0 | 0 | 0 | 0 |
| Tumor pain                                                          | 0                                  | 1 | 0 | 0 | 0 | 0                               | 0 | 0 | 0 | 0 | 0                                | 0 | 0 | 0 | 0 |
| NERVOUS SYSTEM DISORDERS                                            | 10                                 | 5 | 1 | 0 | 0 | 13                              | 6 | 0 | 1 | 0 | 8                                | 5 | 0 | 0 | 0 |
| Ataxia                                                              | 0                                  | 0 | 1 | 0 | 0 | 0                               | 0 | 0 | 0 | 0 | 0                                | 0 | 0 | 0 | 0 |
| Concentration impairment                                            | 1                                  | 0 | 0 | 0 | 0 | 1                               | 0 | 0 | 0 | 0 | 1                                | 0 | 0 | 0 | 0 |
| Depressed level of consciousness                                    | 0                                  | 0 | 0 | 0 | 0 | 0                               | 1 | 0 | 0 | 0 | 0                                | 0 | 0 | 0 | 0 |
| Dizziness                                                           | 3                                  | 0 | 0 | 0 | 0 | 3                               | 2 | 0 | 0 | 0 | 2                                | 0 | 0 | 0 | 0 |
| Dysgeusia                                                           | 4                                  | 2 | 0 | 0 | 0 | 5                               | 3 | 0 | 0 | 0 | 2                                | 2 | 0 | 0 | 0 |
| Dysphasia                                                           | 0                                  | 0 | 0 | 0 | 0 | 1                               | 0 | 0 | 0 | 0 | 1                                | 0 | 0 | 0 | 0 |
| Headache                                                            | 4                                  | 1 | 0 | 0 | 0 | 3                               | 1 | 0 | 0 | 0 | 2                                | 1 | 0 | 0 | 0 |
| Memory impairment                                                   | 1                                  | 0 | 0 | 0 | 0 | 2                               | 0 | 0 | 0 | 0 | 1                                | 0 | 0 | 0 | 0 |
| Nervous system disorders - Other                                    | 0                                  | 0 | 0 | 0 | 0 | 0                               | 0 | 0 | 1 | 0 | 0                                | 0 | 0 | 0 | 0 |
| Paresthesia                                                         | 2                                  | 0 | 0 | 0 | 0 | 1                               | 0 | 0 | 0 | 0 | 0                                | 0 | 0 | 0 | 0 |
| Peripheral sensory neuropathy                                       | 4                                  | 2 | 0 | 0 | 0 | 2                               | 1 | 0 | 0 | 0 | 1                                | 1 | 0 | 0 | 0 |
| Presyncope                                                          | 0                                  | 0 | 0 | 0 | 0 | 0                               | 0 | 0 | 0 | 0 | 1                                | 0 | 0 | 0 | 0 |
| Stroke                                                              | 0                                  | 0 | 0 | 0 | 0 | 0                               | 0 | 0 | 0 | 0 | 0                                | 1 | 0 | 0 | 0 |
| Tremor                                                              | 1                                  | 0 | 0 | 0 | 0 | 0                               | 0 | 0 | 0 | 0 | 0                                | 0 | 0 | 0 | 0 |
| PSYCHIATRIC DISORDERS                                               | 5                                  | 2 | 0 | 0 | 0 | 4                               | 3 | 1 | 0 | 0 | 1                                | 3 | 0 | 0 | 0 |
| Agitation                                                           | 0                                  | 0 | 0 | 0 | 0 | 0                               | 1 | 0 | 0 | 0 | 0                                | 0 | 0 | 0 | 0 |
| Anxiety                                                             | 2                                  | 2 | 0 | 0 | 0 | 2                               | 2 | 0 | 0 | 0 | 1                                | 1 | 0 | 0 | 0 |
| Confusion                                                           | 0                                  | 0 | 0 | 0 | 0 | 0                               | 1 | 0 | 0 | 0 | 0                                | 0 | 0 | 0 | 0 |
| Depression                                                          | 1                                  | 0 | 0 | 0 | 0 | 3                               | 1 | 0 | 0 | 0 | 0                                | 0 | 0 | 0 | 0 |
| Insomnia                                                            | 5                                  | 1 | 0 | 0 | 0 | 3                               | 1 | 1 | 0 | 0 | 0                                | 2 | 0 | 0 | 0 |
| RENAL AND URINARY DISORDERS                                         | 1                                  | 1 | 1 | 0 | 0 | 0                               | 1 | 0 | 0 | 0 | 0                                | 0 | 2 | 0 | 0 |
| Acute kidney injury                                                 | 0                                  | 0 | 1 | 0 | 0 | 0                               | 0 | 0 | 0 | 0 | 0                                | 0 | 1 | 0 | 0 |
| Chronic kidney disease                                              | 0                                  | 0 | 0 | 0 | 0 | 0                               | 0 | 0 | 0 | 0 | 0                                | 0 | 1 | 0 | 0 |
| Hematuria                                                           | 0                                  | 0 | 0 | 0 | 0 | 0                               | 0 | 0 | 0 | 0 | 0                                | 1 | 0 | 0 | 0 |
| Renal and urinary disorders - Other                                 | 1                                  | 1 | 0 | 0 | 0 | 0                               | 0 | 0 | 0 | 0 | 0                                | 1 | 0 | 0 | 0 |
| Urinary retention                                                   | 0                                  | 0 | 0 | 0 | 0 | 0                               | 1 | 0 | 0 | 0 | 0                                | 0 | 0 | 0 | 0 |

Manuka Honey for Esophagitis

| System Organ Class<br>Term                                 | Supportive Care<br>(n=48)<br>Grade |   |   |   |   | Liquid Honey<br>(n=50)<br>Grade |   |   |   |   | Lozenge Honey<br>(n=50)<br>Grade |   |   |   |   |
|------------------------------------------------------------|------------------------------------|---|---|---|---|---------------------------------|---|---|---|---|----------------------------------|---|---|---|---|
|                                                            | 1                                  | 2 | 3 | 4 | 5 | 1                               | 2 | 3 | 4 | 5 | 1                                | 2 | 3 | 4 | 5 |
| <b>RESPIRATORY, THORACIC AND<br/>MEDIASTINAL DISORDERS</b> | 11                                 | 7 | 2 | 0 | 0 | 19                              | 8 | 4 | 1 | 0 | 9                                | 9 | 2 | 0 | 0 |
| Atelectasis                                                | 0                                  | 0 | 0 | 0 | 0 | 0                               | 0 | 1 | 0 | 0 | 0                                | 0 | 0 | 0 | 0 |
| Bronchopulmonary hemorrhage                                | 1                                  | 0 | 1 | 0 | 0 | 0                               | 0 | 0 | 0 | 0 | 0                                | 0 | 0 | 0 | 0 |
| Cough                                                      | 10                                 | 3 | 0 | 0 | 0 | 15                              | 6 | 1 | 0 | 0 | 7                                | 4 | 0 | 0 | 0 |
| Dyspnea                                                    | 4                                  | 4 | 1 | 0 | 0 | 8                               | 7 | 2 | 1 | 0 | 5                                | 7 | 2 | 0 | 0 |
| Epistaxis                                                  | 0                                  | 0 | 0 | 0 | 0 | 1                               | 0 | 0 | 0 | 0 | 0                                | 0 | 0 | 0 | 0 |
| Hiccups                                                    | 0                                  | 1 | 0 | 0 | 0 | 2                               | 0 | 0 | 0 | 0 | 2                                | 1 | 0 | 0 | 0 |
| Hoarseness                                                 | 3                                  | 0 | 0 | 0 | 0 | 2                               | 0 | 0 | 0 | 0 | 1                                | 0 | 0 | 0 | 0 |
| Laryngeal inflammation                                     | 0                                  | 0 | 0 | 0 | 0 | 1                               | 0 | 0 | 0 | 0 | 0                                | 0 | 0 | 0 | 0 |
| Laryngeal mucositis                                        | 0                                  | 0 | 0 | 0 | 0 | 0                               | 1 | 0 | 0 | 0 | 0                                | 0 | 0 | 0 | 0 |
| Laryngeal stenosis                                         | 0                                  | 0 | 0 | 0 | 0 | 0                               | 0 | 1 | 0 | 0 | 0                                | 0 | 0 | 0 | 0 |
| Nasal congestion                                           | 1                                  | 0 | 0 | 0 | 0 | 0                               | 0 | 0 | 0 | 0 | 1                                | 0 | 0 | 0 | 0 |
| Pneumonitis                                                | 0                                  | 0 | 0 | 0 | 0 | 0                               | 1 | 0 | 0 | 0 | 0                                | 0 | 0 | 0 | 0 |
| Productive cough                                           | 2                                  | 0 | 0 | 0 | 0 | 1                               | 1 | 0 | 0 | 0 | 0                                | 0 | 0 | 0 | 0 |
| Respiratory, thoracic and mediastinal disorders -<br>Other | 0                                  | 0 | 0 | 0 | 0 | 0                               | 0 | 0 | 0 | 0 | 1                                | 0 | 0 | 0 | 0 |
| Sinus disorder                                             | 0                                  | 0 | 1 | 0 | 0 | 0                               | 0 | 0 | 0 | 0 | 0                                | 0 | 0 | 0 | 0 |
| Sore throat                                                | 2                                  | 0 | 0 | 0 | 0 | 2                               | 0 | 0 | 0 | 0 | 1                                | 0 | 0 | 0 | 0 |
| Voice alteration                                           | 0                                  | 0 | 0 | 0 | 0 | 3                               | 0 | 0 | 0 | 0 | 2                                | 1 | 0 | 0 | 0 |
| Wheezing                                                   | 0                                  | 0 | 0 | 0 | 0 | 2                               | 1 | 0 | 0 | 0 | 1                                | 0 | 0 | 0 | 0 |
| <b>SKIN AND SUBCUTANEOUS TISSUE<br/>DISORDERS</b>          | 8                                  | 3 | 0 | 0 | 0 | 8                               | 4 | 1 | 0 | 0 | 4                                | 1 | 1 | 0 | 0 |
| Alopecia                                                   | 1                                  | 2 | 0 | 0 | 0 | 0                               | 1 | 0 | 0 | 0 | 1                                | 0 | 0 | 0 | 0 |
| Dry skin                                                   | 5                                  | 0 | 0 | 0 | 0 | 1                               | 0 | 0 | 0 | 0 | 1                                | 0 | 0 | 0 | 0 |
| Erythema multiforme                                        | 1                                  | 0 | 0 | 0 | 0 | 1                               | 0 | 0 | 0 | 0 | 0                                | 0 | 0 | 0 | 0 |
| Palmar-plantar erythrodysesthesia syndrome                 | 0                                  | 0 | 0 | 0 | 0 | 0                               | 0 | 0 | 0 | 0 | 1                                | 0 | 0 | 0 | 0 |
| Pruritus                                                   | 5                                  | 0 | 0 | 0 | 0 | 1                               | 1 | 0 | 0 | 0 | 1                                | 0 | 0 | 0 | 0 |
| Rash acneiform                                             | 0                                  | 1 | 0 | 0 | 0 | 2                               | 1 | 0 | 0 | 0 | 0                                | 0 | 0 | 0 | 0 |

## Manuka Honey for Esophagitis

| System Organ Class<br>Term                     | Supportive Care<br>(n=48)<br>Grade |   |   |   |   | Liquid Honey<br>(n=50)<br>Grade |   |   |   |   | Lozenge Honey<br>(n=50)<br>Grade |   |   |   |   |
|------------------------------------------------|------------------------------------|---|---|---|---|---------------------------------|---|---|---|---|----------------------------------|---|---|---|---|
|                                                | 1                                  | 2 | 3 | 4 | 5 | 1                               | 2 | 3 | 4 | 5 | 1                                | 2 | 3 | 4 | 5 |
| Rash maculo-papular                            | 2                                  | 2 | 0 | 0 | 0 | 3                               | 0 | 0 | 0 | 0 | 0                                | 1 | 0 | 0 | 0 |
| Skin and subcutaneous tissue disorders - Other | 0                                  | 0 | 0 | 0 | 0 | 0                               | 1 | 0 | 0 | 0 | 0                                | 0 | 0 | 0 | 0 |
| Skin hyperpigmentation                         | 1                                  | 0 | 0 | 0 | 0 | 1                               | 0 | 0 | 0 | 0 | 2                                | 0 | 0 | 0 | 0 |
| Skin ulceration                                | 0                                  | 0 | 0 | 0 | 0 | 0                               | 0 | 1 | 0 | 0 | 0                                | 0 | 1 | 0 | 0 |
| <b>VASCULAR DISORDERS</b>                      | 0                                  | 2 | 2 | 1 | 0 | 2                               | 5 | 1 | 0 | 0 | 0                                | 2 | 0 | 0 | 0 |
| Flushing                                       | 0                                  | 0 | 0 | 0 | 0 | 0                               | 1 | 0 | 0 | 0 | 0                                | 0 | 0 | 0 | 0 |
| Hypotension                                    | 0                                  | 1 | 1 | 0 | 0 | 2                               | 1 | 1 | 0 | 0 | 0                                | 1 | 0 | 0 | 0 |
| Phlebitis                                      | 0                                  | 0 | 0 | 0 | 0 | 0                               | 1 | 0 | 0 | 0 | 0                                | 0 | 0 | 0 | 0 |
| Superficial thrombophlebitis                   | 0                                  | 1 | 0 | 0 | 0 | 0                               | 0 | 0 | 0 | 0 | 0                                | 0 | 0 | 0 | 0 |
| Thromboembolic event                           | 1                                  | 0 | 1 | 1 | 0 | 0                               | 2 | 0 | 0 | 0 | 0                                | 1 | 0 | 0 | 0 |

Includes adverse events where relationship to protocol treatment is missing.

Adverse events were graded with CTCAE version 4.
